# Supplementary material
Source: Springer Nature journal article supplement (https://www.springermedizin.de/resource/supplementary/12968_2013_3337_MOESM2_ESM.pdf/9583652)

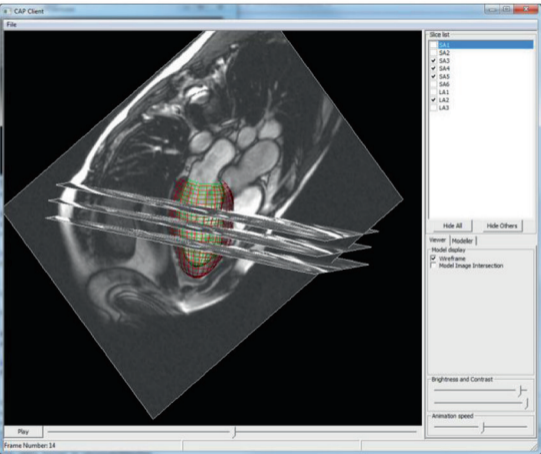

a

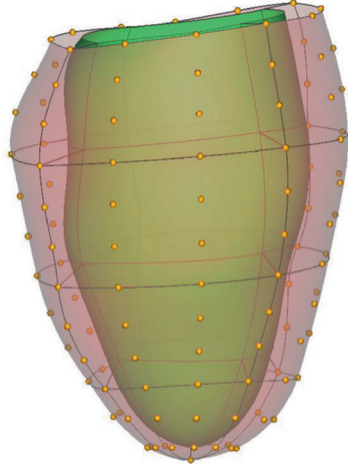

b

Supplement: MOESM2 [file 9583652]
